# Supplementary material
Source: publisher figshare collection journal article supplement (https://acs.figshare.com/ndownloader/files/5525357)
Supplement: Supplementary file 1 [file 5525357]

 
data_15058 
 
_audit_creation_method            SHELXL-97 
_chemical_name_systematic 
; 
 ? 
; 
_chemical_name_common             ? 
_chemical_melting_point           ? 
_chemical_formula_moiety          'C30 H33 N5 O2' 
_chemical_formula_sum 
 'C30 H33 N5 O2' 
_chemical_formula_weight          495.61 
 
loop_ 
 _atom_type_symbol 
 _atom_type_description 
 _atom_type_scat_dispersion_real 
 _atom_type_scat_dispersion_imag 
 _atom_type_scat_source 
 'C'  'C'   0.0033   0.0016 
 'International Tables Vol C Tables 4.2.6.8 and 6.1.1.4' 
 'H'  'H'   0.0000   0.0000 
 'International Tables Vol C Tables 4.2.6.8 and 6.1.1.4' 
 'N'  'N'   0.0061   0.0033 
 'International Tables Vol C Tables 4.2.6.8 and 6.1.1.4' 
 'O'  'O'   0.0106   0.0060 
 'International Tables Vol C Tables 4.2.6.8 and 6.1.1.4' 
 
_symmetry_cell_setting            Triclinic 
_symmetry_space_group_name_H-M    P-1
_symmetry_space_group_name_Hall   '-P 1'
 
loop_ 
 _symmetry_equiv_pos_as_xyz 
 'x, y, z' 
 '-x, -y, -z' 
 
_cell_length_a                    7.2513(9) 
_cell_length_b                    9.3654(13) 
_cell_length_c                    20.598(3) 
_cell_angle_alpha                 95.768(6) 
_cell_angle_beta                  98.328(7) 
_cell_angle_gamma                 104.441(6) 
_cell_volume                      1326.6(3) 
_cell_formula_units_Z             2 
_cell_measurement_temperature     150(2) 
_cell_measurement_reflns_used       970
_cell_measurement_theta_min        2.27
_cell_measurement_theta_max       20.63 
 
_exptl_crystal_description        plate
_exptl_crystal_colour             brown
_exptl_crystal_size_max           0.21 
_exptl_crystal_size_mid           0.09 
_exptl_crystal_size_min           0.01 
_exptl_crystal_density_meas       ? 
_exptl_crystal_density_diffrn     1.241 
_exptl_crystal_density_method     'not measured' 
_exptl_crystal_F_000              528 
_exptl_absorpt_coefficient_mu     0.080 
_exptl_absorpt_correction_type    multi-scan 
_exptl_absorpt_correction_T_min   0.9835 
_exptl_absorpt_correction_T_max   0.9992 
_exptl_absorpt_process_details    'SADABS, G. Sheldrick; 2014'
 
_exptl_special_details 
; 
 ? 
; 
 
_diffrn_ambient_temperature       150(2) 
_diffrn_radiation_wavelength      0.71073 
_diffrn_radiation_type            MoK\a 
_diffrn_radiation_source          'fine-focus sealed tube' 
_diffrn_radiation_monochromator   graphite 
_diffrn_measurement_details  
 '0.50 degree frames measured for 180 seconds each' 
_diffrn_measurement_method        'omega and phi scans' 
_diffrn_measurement_device        'APEX Kappa Duo' 
_diffrn_measurement_device_type   'Kappa' 
_diffrn_detector                  'CCD area detector' 
_diffrn_detector_type             'Bruker APEXII'
_diffrn_detector_area_resol_mean  83.33
_diffrn_reflns_number             10693 
_diffrn_reflns_av_R_equivalents   0.0935 
_diffrn_reflns_av_sigmaI/netI     0.1997 
_diffrn_reflns_limit_h_min        -8 
_diffrn_reflns_limit_h_max        8 
_diffrn_reflns_limit_k_min        -11 
_diffrn_reflns_limit_k_max        11 
_diffrn_reflns_limit_l_min        -24 
_diffrn_reflns_limit_l_max        25 
_diffrn_reflns_theta_min          2.02 
_diffrn_reflns_theta_max          25.74 
_reflns_number_total              4842 
_reflns_number_gt                 1938 
_reflns_threshold_expression      >2sigma(I) 
 
_computing_data_collection        'APEX II v2010.11.3 (Bruker, 2013)' 
_computing_cell_refinement        'APEX II v2010.11.3 (Bruker, 2013)'
_computing_data_reduction         'APEX II v2010.11.3 (Bruker, 2013)' 
_computing_structure_solution     'SHELXTL (Bruker, 2013)' 
_computing_structure_refinement   'SHELXTL (Bruker, 2012)' 
_computing_molecular_graphics     'SHELXTL (Bruker, 2013)' 
_computing_publication_material   'SHELXTL (Bruker, 2013)'
 
_refine_special_details 
; 
 Refinement of F^2^ against ALL reflections.  The weighted R-factor wR and 
 goodness of fit S are based on F^2^, conventional R-factors R are based 
 on F, with F set to zero for negative F^2^. The threshold expression of 
 F^2^ > 2sigma(F^2^) is used only for calculating R-factors(gt) etc. and is 
 not relevant to the choice of reflections for refinement.  R-factors based 
 on F^2^ are statistically about twice as large as those based on F, and R- 
 factors based on ALL data will be even larger. 
; 
 
_refine_ls_structure_factor_coef  Fsqd  
_refine_ls_matrix_type            full 
_refine_ls_weighting_scheme       calc  
_refine_ls_weighting_details 
 'calc w=1/[\s^2^(Fo^2^)+(0.0756P)^2^+0.0000P] where P=(Fo^2^+2Fc^2^)/3' 
_atom_sites_solution_primary      direct 
_atom_sites_solution_secondary    difmap 
_atom_sites_solution_hydrogens    geom 
_refine_ls_hydrogen_treatment     constr
_refine_ls_extinction_method      SHELXL 
_refine_ls_extinction_coef        0.020(3) 
_refine_ls_extinction_expression 
 'Fc^*^=kFc[1+0.001xFc^2^\l^3^/sin(2\q)]^-1/4^' 
_refine_ls_number_reflns          4842 
_refine_ls_number_parameters      342 
_refine_ls_number_restraints      0 
_refine_ls_R_factor_all           0.2050 
_refine_ls_R_factor_gt            0.0687 
_refine_ls_wR_factor_ref          0.1903 
_refine_ls_wR_factor_gt           0.1368 
_refine_ls_goodness_of_fit_ref    0.911 
_refine_ls_restrained_S_all       0.911 
_refine_ls_shift/su_max           0.000 
_refine_ls_shift/su_mean          0.000 
 
loop_ 
 _atom_site_label 
 _atom_site_type_symbol 
 _atom_site_fract_x 
 _atom_site_fract_y 
 _atom_site_fract_z 
 _atom_site_U_iso_or_equiv 
 _atom_site_adp_type 
 _atom_site_occupancy 
 _atom_site_symmetry_multiplicity 
 _atom_site_calc_flag 
 _atom_site_refinement_flags 
 _atom_site_disorder_assembly 
 _atom_site_disorder_group 
O1 O 1.0398(4) 0.7960(3) 0.46350(14) 0.0379(9) Uani 1 1 d . . . 
O2 O 0.4625(4) 0.6723(4) 0.54271(14) 0.0424(9) Uani 1 1 d . . . 
N1 N 0.9170(5) 0.7684(4) 0.50282(16) 0.0290(9) Uani 1 1 d . . . 
N2 N 0.6426(5) 0.7154(4) 0.54065(16) 0.0294(9) Uani 1 1 d . . . 
N3 N 0.2842(5) 0.6404(4) 0.22655(16) 0.0290(9) Uani 1 1 d . . . 
N4 N 0.0305(5) 0.5333(4) 0.10803(16) 0.0328(10) Uani 1 1 d . . . 
N5 N 0.0975(5) 0.5633(4) 0.22698(17) 0.0314(9) Uani 1 1 d . . . 
C1 C 0.6145(6) 0.7127(5) 0.4181(2) 0.0262(11) Uani 1 1 d . . . 
C2 C 0.6896(7) 0.6667(5) 0.3625(2) 0.0293(11) Uani 1 1 d . . . 
H2 H 0.8141 0.6492 0.3686 0.035 Uiso 1 1 calc R . . 
C3 C 0.5841(7) 0.6469(5) 0.2996(2) 0.0315(12) Uani 1 1 d . . . 
H3 H 0.6346 0.6145 0.2624 0.038 Uiso 1 1 calc R . . 
C4 C 0.4025(7) 0.6747(5) 0.2907(2) 0.0272(11) Uani 1 1 d . . . 
C5 C 0.3275(7) 0.7219(4) 0.3448(2) 0.0283(11) Uani 1 1 d . . . 
H5 H 0.2039 0.7410 0.3384 0.034 Uiso 1 1 calc R . . 
C6 C 0.4326(6) 0.7410(5) 0.4077(2) 0.0275(11) Uani 1 1 d . . . 
H6 H 0.3811 0.7737 0.4446 0.033 Uiso 1 1 calc R . . 
C7 C 0.7215(6) 0.7305(5) 0.4851(2) 0.0272(11) Uani 1 1 d . . . 
C8 C 0.9782(6) 0.7626(5) 0.57501(19) 0.0282(11) Uani 1 1 d . . . 
C9 C 0.7925(6) 0.7730(5) 0.60199(19) 0.0265(11) Uani 1 1 d . . . 
C10 C 1.1561(7) 0.8897(5) 0.6028(2) 0.0413(13) Uani 1 1 d . . . 
H10A H 1.1293 0.9843 0.5943 0.062 Uiso 1 1 calc R . . 
H10B H 1.2641 0.8764 0.5814 0.062 Uiso 1 1 calc R . . 
H10C H 1.1901 0.8908 0.6507 0.062 Uiso 1 1 calc R . . 
C11 C 1.0223(6) 0.6126(5) 0.5792(2) 0.0352(12) Uani 1 1 d . . . 
H11A H 0.9072 0.5323 0.5588 0.053 Uiso 1 1 calc R . . 
H11B H 1.0589 0.6019 0.6258 0.053 Uiso 1 1 calc R . . 
H11C H 1.1291 0.6072 0.5557 0.053 Uiso 1 1 calc R . . 
C12 C 0.7854(7) 0.9323(5) 0.6236(2) 0.0396(13) Uani 1 1 d . . . 
H12A H 0.8151 0.9926 0.5883 0.059 Uiso 1 1 calc R . . 
H12B H 0.8807 0.9751 0.6641 0.059 Uiso 1 1 calc R . . 
H12C H 0.6557 0.9313 0.6323 0.059 Uiso 1 1 calc R . . 
C13 C 0.7416(7) 0.6775(5) 0.6556(2) 0.0356(12) Uani 1 1 d . . . 
H13A H 0.7473 0.5758 0.6416 0.053 Uiso 1 1 calc R . . 
H13B H 0.6107 0.6758 0.6630 0.053 Uiso 1 1 calc R . . 
H13C H 0.8340 0.7193 0.6968 0.053 Uiso 1 1 calc R . . 
C14 C 0.3461(7) 0.6825(5) 0.1684(2) 0.0281(11) Uani 1 1 d . . . 
C15 C 0.5266(7) 0.7784(5) 0.1683(2) 0.0325(12) Uani 1 1 d . . . 
H15 H 0.6102 0.8217 0.2092 0.039 Uiso 1 1 calc R . . 
C16 C 0.5862(7) 0.8118(5) 0.1092(2) 0.0341(12) Uani 1 1 d . . . 
C17 C 0.4548(7) 0.7479(5) 0.0503(2) 0.0360(12) Uani 1 1 d . . . 
H17 H 0.4930 0.7677 0.0092 0.043 Uiso 1 1 calc R . . 
C18 C 0.2731(7) 0.6577(5) 0.0499(2) 0.0324(12) Uani 1 1 d . . . 
H18 H 0.1869 0.6192 0.0090 0.039 Uiso 1 1 calc R . . 
C19 C 0.2146(7) 0.6223(5) 0.1094(2) 0.0296(11) Uani 1 1 d . . . 
C20 C -0.0152(7) 0.5138(5) 0.1675(2) 0.0290(11) Uani 1 1 d . . . 
C21 C -0.2138(7) 0.4281(5) 0.1708(2) 0.0315(12) Uani 1 1 d . . . 
C22 C -0.2492(7) 0.3423(5) 0.2219(2) 0.0413(13) Uani 1 1 d . . . 
H22 H -0.1448 0.3404 0.2552 0.050 Uiso 1 1 calc R . . 
C23 C -0.4340(8) 0.2610(6) 0.2242(3) 0.0516(15) Uani 1 1 d . . . 
H23 H -0.4561 0.2020 0.2587 0.062 Uiso 1 1 calc R . . 
C24 C -0.5861(8) 0.2647(6) 0.1771(3) 0.0531(15) Uani 1 1 d . . . 
H24 H -0.7137 0.2100 0.1794 0.064 Uiso 1 1 calc R . . 
C25 C -0.5534(8) 0.3486(6) 0.1260(3) 0.0469(14) Uani 1 1 d . . . 
H25 H -0.6589 0.3516 0.0934 0.056 Uiso 1 1 calc R . . 
C26 C -0.3663(7) 0.4285(5) 0.1225(2) 0.0383(12) Uani 1 1 d . . . 
H26 H -0.3439 0.4833 0.0867 0.046 Uiso 1 1 calc R . . 
C27 C 0.7837(7) 0.9135(5) 0.1068(2) 0.0400(13) Uani 1 1 d . . . 
C28 C 0.7573(8) 1.0593(5) 0.0845(2) 0.0561(16) Uani 1 1 d . . . 
H28A H 0.6794 1.0383 0.0399 0.084 Uiso 1 1 calc R . . 
H28B H 0.8842 1.1267 0.0840 0.084 Uiso 1 1 calc R . . 
H28D H 0.6914 1.1060 0.1154 0.084 Uiso 1 1 calc R . . 
C29 C 0.8816(7) 0.8402(6) 0.0568(3) 0.0560(16) Uani 1 1 d . . . 
H29A H 0.8019 0.8225 0.0126 0.084 Uiso 1 1 calc R . . 
H29D H 0.8961 0.7452 0.0697 0.084 Uiso 1 1 calc R . . 
H29B H 1.0094 0.9062 0.0561 0.084 Uiso 1 1 calc R . . 
C30 C 0.9141(8) 0.9476(7) 0.1748(3) 0.091(2) Uani 1 1 d . . . 
H30D H 0.9193 0.8541 0.1916 0.136 Uiso 1 1 calc R . . 
H30A H 0.8620 1.0071 0.2057 0.136 Uiso 1 1 calc R . . 
H30B H 1.0447 1.0035 0.1709 0.136 Uiso 1 1 calc R . . 
 
loop_ 
 _atom_site_aniso_label 
 _atom_site_aniso_U_11 
 _atom_site_aniso_U_22 
 _atom_site_aniso_U_33 
 _atom_site_aniso_U_23 
 _atom_site_aniso_U_13 
 _atom_site_aniso_U_12 
O1 0.029(2) 0.051(2) 0.0367(18) 0.0204(15) 0.0211(16) 0.0032(17) 
O2 0.027(2) 0.064(2) 0.0368(19) 0.0185(16) 0.0154(16) 0.0035(18) 
N1 0.028(2) 0.035(2) 0.028(2) 0.0178(17) 0.0137(19) 0.0056(19) 
N2 0.024(2) 0.037(2) 0.029(2) 0.0144(17) 0.0134(18) 0.0022(19) 
N3 0.027(2) 0.033(2) 0.026(2) 0.0114(16) 0.0075(18) 0.0021(18) 
N4 0.034(3) 0.038(2) 0.028(2) 0.0130(17) 0.0110(19) 0.007(2) 
N5 0.024(2) 0.036(2) 0.031(2) 0.0100(17) 0.0103(19) -0.0019(19) 
C1 0.027(3) 0.028(3) 0.027(2) 0.0152(19) 0.012(2) 0.004(2) 
C2 0.030(3) 0.024(3) 0.036(3) 0.012(2) 0.015(2) 0.005(2) 
C3 0.039(3) 0.037(3) 0.021(2) 0.010(2) 0.011(2) 0.011(2) 
C4 0.031(3) 0.023(3) 0.026(3) 0.0143(19) 0.009(2) 0.000(2) 
C5 0.029(3) 0.024(3) 0.034(3) 0.013(2) 0.010(2) 0.004(2) 
C6 0.030(3) 0.027(3) 0.027(3) 0.0070(19) 0.013(2) 0.005(2) 
C7 0.023(3) 0.031(3) 0.031(3) 0.014(2) 0.011(2) 0.006(2) 
C8 0.031(3) 0.031(3) 0.020(2) 0.0070(19) 0.003(2) 0.003(2) 
C9 0.034(3) 0.026(3) 0.022(2) 0.0108(19) 0.012(2) 0.007(2) 
C10 0.039(3) 0.046(3) 0.037(3) 0.010(2) 0.003(2) 0.009(3) 
C11 0.034(3) 0.042(3) 0.031(3) 0.011(2) 0.013(2) 0.008(2) 
C12 0.046(3) 0.037(3) 0.042(3) 0.014(2) 0.021(3) 0.013(3) 
C13 0.046(3) 0.035(3) 0.031(3) 0.014(2) 0.021(2) 0.009(2) 
C14 0.035(3) 0.026(3) 0.026(3) 0.012(2) 0.009(2) 0.008(2) 
C15 0.034(3) 0.031(3) 0.029(3) 0.009(2) 0.004(2) 0.000(2) 
C16 0.036(3) 0.034(3) 0.032(3) 0.016(2) 0.005(2) 0.005(2) 
C17 0.039(3) 0.043(3) 0.035(3) 0.022(2) 0.017(2) 0.014(3) 
C18 0.030(3) 0.040(3) 0.029(3) 0.013(2) 0.010(2) 0.006(2) 
C19 0.030(3) 0.034(3) 0.028(3) 0.011(2) 0.011(2) 0.009(2) 
C20 0.028(3) 0.029(3) 0.033(3) 0.012(2) 0.011(2) 0.006(2) 
C21 0.028(3) 0.029(3) 0.035(3) 0.000(2) 0.014(2) 0.002(2) 
C22 0.043(3) 0.043(3) 0.038(3) 0.008(2) 0.020(3) 0.002(3) 
C23 0.053(4) 0.055(4) 0.047(3) 0.009(3) 0.025(3) 0.004(3) 
C24 0.044(4) 0.045(4) 0.066(4) 0.004(3) 0.035(3) -0.007(3) 
C25 0.040(3) 0.044(3) 0.054(3) -0.005(3) 0.014(3) 0.008(3) 
C26 0.037(3) 0.032(3) 0.042(3) 0.000(2) 0.013(3) 0.002(2) 
C27 0.037(3) 0.039(3) 0.038(3) 0.022(2) 0.011(2) -0.010(3) 
C28 0.068(4) 0.042(3) 0.063(4) 0.018(3) 0.032(3) 0.006(3) 
C29 0.040(3) 0.052(4) 0.088(4) 0.034(3) 0.027(3) 0.014(3) 
C30 0.062(4) 0.114(6) 0.057(4) 0.040(4) -0.011(3) -0.046(4) 
 
_geom_special_details 
; 
 All esds (except the esd in the dihedral angle between two l.s. planes) 
 are estimated using the full covariance matrix.  The cell esds are taken 
 into account individually in the estimation of esds in distances, angles 
 and torsion angles; correlations between esds in cell parameters are only 
 used when they are defined by crystal symmetry.  An approximate (isotropic) 
 treatment of cell esds is used for estimating esds involving l.s. planes. 
; 
 
loop_ 
 _geom_bond_atom_site_label_1 
 _geom_bond_atom_site_label_2 
 _geom_bond_distance 
 _geom_bond_site_symmetry_2 
 _geom_bond_publ_flag 
O1 N1 1.285(4) . ? 
O2 N2 1.275(4) . ? 
N1 C7 1.357(5) . ? 
N1 C8 1.499(5) . ? 
N2 C7 1.357(5) . ? 
N2 C9 1.497(5) . ? 
N3 N5 1.368(5) . ? 
N3 C14 1.397(5) . ? 
N3 C4 1.426(5) . ? 
N4 C20 1.333(5) . ? 
N4 C19 1.381(5) . ? 
N5 C20 1.338(5) . ? 
C1 C6 1.400(6) . ? 
C1 C2 1.411(5) . ? 
C1 C7 1.454(6) . ? 
C2 C3 1.376(5) . ? 
C2 H2 0.9500 . ? 
C3 C4 1.395(6) . ? 
C3 H3 0.9500 . ? 
C4 C5 1.390(6) . ? 
C5 C6 1.374(6) . ? 
C5 H5 0.9500 . ? 
C6 H6 0.9500 . ? 
C8 C10 1.514(6) . ? 
C8 C11 1.524(6) . ? 
C8 C9 1.550(6) . ? 
C9 C13 1.519(5) . ? 
C9 C12 1.530(6) . ? 
C10 H10A 0.9800 . ? 
C10 H10B 0.9800 . ? 
C10 H10C 0.9800 . ? 
C11 H11A 0.9800 . ? 
C11 H11B 0.9800 . ? 
C11 H11C 0.9800 . ? 
C12 H12A 0.9800 . ? 
C12 H12B 0.9800 . ? 
C12 H12C 0.9800 . ? 
C13 H13A 0.9800 . ? 
C13 H13B 0.9800 . ? 
C13 H13C 0.9800 . ? 
C14 C15 1.391(6) . ? 
C14 C19 1.400(6) . ? 
C15 C16 1.387(6) . ? 
C15 H15 0.9500 . ? 
C16 C17 1.405(6) . ? 
C16 C27 1.520(6) . ? 
C17 C18 1.375(6) . ? 
C17 H17 0.9500 . ? 
C18 C19 1.399(5) . ? 
C18 H18 0.9500 . ? 
C20 C21 1.478(6) . ? 
C21 C26 1.378(6) . ? 
C21 C22 1.401(6) . ? 
C22 C23 1.377(6) . ? 
C22 H22 0.9500 . ? 
C23 C24 1.369(7) . ? 
C23 H23 0.9500 . ? 
C24 C25 1.388(7) . ? 
C24 H24 0.9500 . ? 
C25 C26 1.392(6) . ? 
C25 H25 0.9500 . ? 
C26 H26 0.9500 . ? 
C27 C30 1.528(6) . ? 
C27 C28 1.530(6) . ? 
C27 C29 1.532(7) . ? 
C28 H28A 0.9800 . ? 
C28 H28B 0.9800 . ? 
C28 H28D 0.9800 . ? 
C29 H29A 0.9800 . ? 
C29 H29D 0.9800 . ? 
C29 H29B 0.9800 . ? 
C30 H30D 0.9800 . ? 
C30 H30A 0.9800 . ? 
C30 H30B 0.9800 . ? 
 
loop_ 
 _geom_angle_atom_site_label_1 
 _geom_angle_atom_site_label_2 
 _geom_angle_atom_site_label_3 
 _geom_angle 
 _geom_angle_site_symmetry_1 
 _geom_angle_site_symmetry_3 
 _geom_angle_publ_flag 
O1 N1 C7 126.0(3) . . ? 
O1 N1 C8 122.1(3) . . ? 
C7 N1 C8 111.7(3) . . ? 
O2 N2 C7 126.0(4) . . ? 
O2 N2 C9 122.2(3) . . ? 
C7 N2 C9 111.5(4) . . ? 
N5 N3 C14 121.9(4) . . ? 
N5 N3 C4 113.1(3) . . ? 
C14 N3 C4 124.9(4) . . ? 
C20 N4 C19 114.6(4) . . ? 
C20 N5 N3 115.9(3) . . ? 
C6 C1 C2 118.6(4) . . ? 
C6 C1 C7 120.0(4) . . ? 
C2 C1 C7 121.4(4) . . ? 
C3 C2 C1 120.6(4) . . ? 
C3 C2 H2 119.7 . . ? 
C1 C2 H2 119.7 . . ? 
C2 C3 C4 119.6(4) . . ? 
C2 C3 H3 120.2 . . ? 
C4 C3 H3 120.2 . . ? 
C5 C4 C3 120.5(4) . . ? 
C5 C4 N3 119.2(4) . . ? 
C3 C4 N3 119.9(4) . . ? 
C6 C5 C4 119.8(4) . . ? 
C6 C5 H5 120.1 . . ? 
C4 C5 H5 120.1 . . ? 
C5 C6 C1 120.8(4) . . ? 
C5 C6 H6 119.6 . . ? 
C1 C6 H6 119.6 . . ? 
N2 C7 N1 108.4(4) . . ? 
N2 C7 C1 125.6(4) . . ? 
N1 C7 C1 125.9(4) . . ? 
N1 C8 C10 109.4(3) . . ? 
N1 C8 C11 106.3(3) . . ? 
C10 C8 C11 110.9(4) . . ? 
N1 C8 C9 100.9(3) . . ? 
C10 C8 C9 115.2(4) . . ? 
C11 C8 C9 113.2(3) . . ? 
N2 C9 C13 109.3(4) . . ? 
N2 C9 C12 106.2(3) . . ? 
C13 C9 C12 109.9(3) . . ? 
N2 C9 C8 100.9(3) . . ? 
C13 C9 C8 115.6(4) . . ? 
C12 C9 C8 114.1(4) . . ? 
C8 C10 H10A 109.5 . . ? 
C8 C10 H10B 109.5 . . ? 
H10A C10 H10B 109.5 . . ? 
C8 C10 H10C 109.5 . . ? 
H10A C10 H10C 109.5 . . ? 
H10B C10 H10C 109.5 . . ? 
C8 C11 H11A 109.5 . . ? 
C8 C11 H11B 109.5 . . ? 
H11A C11 H11B 109.5 . . ? 
C8 C11 H11C 109.5 . . ? 
H11A C11 H11C 109.5 . . ? 
H11B C11 H11C 109.5 . . ? 
C9 C12 H12A 109.5 . . ? 
C9 C12 H12B 109.5 . . ? 
H12A C12 H12B 109.5 . . ? 
C9 C12 H12C 109.5 . . ? 
H12A C12 H12C 109.5 . . ? 
H12B C12 H12C 109.5 . . ? 
C9 C13 H13A 109.5 . . ? 
C9 C13 H13B 109.5 . . ? 
H13A C13 H13B 109.5 . . ? 
C9 C13 H13C 109.5 . . ? 
H13A C13 H13C 109.5 . . ? 
H13B C13 H13C 109.5 . . ? 
C15 C14 N3 122.7(4) . . ? 
C15 C14 C19 121.4(4) . . ? 
N3 C14 C19 115.9(4) . . ? 
C16 C15 C14 120.9(4) . . ? 
C16 C15 H15 119.5 . . ? 
C14 C15 H15 119.5 . . ? 
C15 C16 C17 117.1(4) . . ? 
C15 C16 C27 122.6(4) . . ? 
C17 C16 C27 120.2(4) . . ? 
C18 C17 C16 122.5(4) . . ? 
C18 C17 H17 118.8 . . ? 
C16 C17 H17 118.8 . . ? 
C17 C18 C19 120.2(4) . . ? 
C17 C18 H18 119.9 . . ? 
C19 C18 H18 119.9 . . ? 
N4 C19 C18 119.3(4) . . ? 
N4 C19 C14 122.9(4) . . ? 
C18 C19 C14 117.8(4) . . ? 
N4 C20 N5 128.1(4) . . ? 
N4 C20 C21 118.3(4) . . ? 
N5 C20 C21 113.7(4) . . ? 
C26 C21 C22 119.0(4) . . ? 
C26 C21 C20 120.2(4) . . ? 
C22 C21 C20 120.7(4) . . ? 
C23 C22 C21 120.5(5) . . ? 
C23 C22 H22 119.7 . . ? 
C21 C22 H22 119.7 . . ? 
C24 C23 C22 120.3(5) . . ? 
C24 C23 H23 119.8 . . ? 
C22 C23 H23 119.8 . . ? 
C23 C24 C25 119.9(5) . . ? 
C23 C24 H24 120.0 . . ? 
C25 C24 H24 120.0 . . ? 
C24 C25 C26 120.1(5) . . ? 
C24 C25 H25 119.9 . . ? 
C26 C25 H25 119.9 . . ? 
C21 C26 C25 120.1(4) . . ? 
C21 C26 H26 120.0 . . ? 
C25 C26 H26 120.0 . . ? 
C16 C27 C30 111.0(4) . . ? 
C16 C27 C28 108.9(4) . . ? 
C30 C27 C28 109.2(4) . . ? 
C16 C27 C29 110.2(4) . . ? 
C30 C27 C29 108.9(5) . . ? 
C28 C27 C29 108.5(4) . . ? 
C27 C28 H28A 109.5 . . ? 
C27 C28 H28B 109.5 . . ? 
H28A C28 H28B 109.5 . . ? 
C27 C28 H28D 109.5 . . ? 
H28A C28 H28D 109.5 . . ? 
H28B C28 H28D 109.5 . . ? 
C27 C29 H29A 109.5 . . ? 
C27 C29 H29D 109.5 . . ? 
H29A C29 H29D 109.5 . . ? 
C27 C29 H29B 109.5 . . ? 
H29A C29 H29B 109.5 . . ? 
H29D C29 H29B 109.5 . . ? 
C27 C30 H30D 109.5 . . ? 
C27 C30 H30A 109.5 . . ? 
H30D C30 H30A 109.5 . . ? 
C27 C30 H30B 109.5 . . ? 
H30D C30 H30B 109.5 . . ? 
H30A C30 H30B 109.5 . . ? 
 
loop_ 
 _geom_torsion_atom_site_label_1 
 _geom_torsion_atom_site_label_2 
 _geom_torsion_atom_site_label_3 
 _geom_torsion_atom_site_label_4 
 _geom_torsion 
 _geom_torsion_site_symmetry_1 
 _geom_torsion_site_symmetry_2 
 _geom_torsion_site_symmetry_3 
 _geom_torsion_site_symmetry_4 
 _geom_torsion_publ_flag 
C14 N3 N5 C20 8.4(6) . . . . ? 
C4 N3 N5 C20 -173.0(4) . . . . ? 
C6 C1 C2 C3 -1.4(6) . . . . ? 
C7 C1 C2 C3 178.4(4) . . . . ? 
C1 C2 C3 C4 0.9(6) . . . . ? 
C2 C3 C4 C5 -0.1(6) . . . . ? 
C2 C3 C4 N3 -173.7(4) . . . . ? 
N5 N3 C4 C5 -41.5(5) . . . . ? 
C14 N3 C4 C5 137.0(4) . . . . ? 
N5 N3 C4 C3 132.2(4) . . . . ? 
C14 N3 C4 C3 -49.3(6) . . . . ? 
C3 C4 C5 C6 -0.2(6) . . . . ? 
N3 C4 C5 C6 173.5(4) . . . . ? 
C4 C5 C6 C1 -0.3(6) . . . . ? 
C2 C1 C6 C5 1.1(6) . . . . ? 
C7 C1 C6 C5 -178.7(4) . . . . ? 
O2 N2 C7 N1 -175.8(4) . . . . ? 
C9 N2 C7 N1 11.0(5) . . . . ? 
O2 N2 C7 C1 5.6(7) . . . . ? 
C9 N2 C7 C1 -167.7(4) . . . . ? 
O1 N1 C7 N2 -178.0(4) . . . . ? 
C8 N1 C7 N2 6.8(5) . . . . ? 
O1 N1 C7 C1 0.6(7) . . . . ? 
C8 N1 C7 C1 -174.6(4) . . . . ? 
C6 C1 C7 N2 27.7(6) . . . . ? 
C2 C1 C7 N2 -152.2(4) . . . . ? 
C6 C1 C7 N1 -150.7(4) . . . . ? 
C2 C1 C7 N1 29.4(6) . . . . ? 
O1 N1 C8 C10 42.4(5) . . . . ? 
C7 N1 C8 C10 -142.2(4) . . . . ? 
O1 N1 C8 C11 -77.5(4) . . . . ? 
C7 N1 C8 C11 97.9(4) . . . . ? 
O1 N1 C8 C9 164.2(3) . . . . ? 
C7 N1 C8 C9 -20.3(4) . . . . ? 
O2 N2 C9 C13 41.3(5) . . . . ? 
C7 N2 C9 C13 -145.1(4) . . . . ? 
O2 N2 C9 C12 -77.2(5) . . . . ? 
C7 N2 C9 C12 96.4(4) . . . . ? 
O2 N2 C9 C8 163.6(4) . . . . ? 
C7 N2 C9 C8 -22.8(4) . . . . ? 
N1 C8 C9 N2 24.0(4) . . . . ? 
C10 C8 C9 N2 141.7(4) . . . . ? 
C11 C8 C9 N2 -89.1(4) . . . . ? 
N1 C8 C9 C13 141.7(4) . . . . ? 
C10 C8 C9 C13 -100.6(5) . . . . ? 
C11 C8 C9 C13 28.6(5) . . . . ? 
N1 C8 C9 C12 -89.4(4) . . . . ? 
C10 C8 C9 C12 28.3(5) . . . . ? 
C11 C8 C9 C12 157.5(4) . . . . ? 
N5 N3 C14 C15 170.7(4) . . . . ? 
C4 N3 C14 C15 -7.7(7) . . . . ? 
N5 N3 C14 C19 -9.2(6) . . . . ? 
C4 N3 C14 C19 172.5(4) . . . . ? 
N3 C14 C15 C16 176.9(4) . . . . ? 
C19 C14 C15 C16 -3.3(7) . . . . ? 
C14 C15 C16 C17 1.7(7) . . . . ? 
C14 C15 C16 C27 -178.7(4) . . . . ? 
C15 C16 C17 C18 1.0(7) . . . . ? 
C27 C16 C17 C18 -178.6(4) . . . . ? 
C16 C17 C18 C19 -2.1(7) . . . . ? 
C20 N4 C19 C18 -176.0(4) . . . . ? 
C20 N4 C19 C14 2.6(6) . . . . ? 
C17 C18 C19 N4 179.1(4) . . . . ? 
C17 C18 C19 C14 0.5(6) . . . . ? 
C15 C14 C19 N4 -176.4(4) . . . . ? 
N3 C14 C19 N4 3.4(6) . . . . ? 
C15 C14 C19 C18 2.2(7) . . . . ? 
N3 C14 C19 C18 -178.0(4) . . . . ? 
C19 N4 C20 N5 -3.6(6) . . . . ? 
C19 N4 C20 C21 176.1(4) . . . . ? 
N3 N5 C20 N4 -1.7(7) . . . . ? 
N3 N5 C20 C21 178.5(4) . . . . ? 
N4 C20 C21 C26 -29.9(6) . . . . ? 
N5 C20 C21 C26 149.9(4) . . . . ? 
N4 C20 C21 C22 148.5(4) . . . . ? 
N5 C20 C21 C22 -31.8(6) . . . . ? 
C26 C21 C22 C23 -0.7(7) . . . . ? 
C20 C21 C22 C23 -179.1(4) . . . . ? 
C21 C22 C23 C24 -1.0(7) . . . . ? 
C22 C23 C24 C25 1.3(8) . . . . ? 
C23 C24 C25 C26 0.2(8) . . . . ? 
C22 C21 C26 C25 2.2(6) . . . . ? 
C20 C21 C26 C25 -179.4(4) . . . . ? 
C24 C25 C26 C21 -2.0(7) . . . . ? 
C15 C16 C27 C30 10.4(7) . . . . ? 
C17 C16 C27 C30 -170.0(5) . . . . ? 
C15 C16 C27 C28 -109.9(5) . . . . ? 
C17 C16 C27 C28 69.7(5) . . . . ? 
C15 C16 C27 C29 131.2(5) . . . . ? 
C17 C16 C27 C29 -49.2(6) . . . . ? 
 
_diffrn_measured_fraction_theta_max    0.954 
_diffrn_reflns_theta_full              25.74 
_diffrn_measured_fraction_theta_full   0.954 
_refine_diff_density_max    0.256 
_refine_diff_density_min   -0.257 
_refine_diff_density_rms    0.062 
